# Supplementary material for: Nanodomain cubic cuprous oxide as reusable catalyst in one-pot synthesis of 3-alkyl/aryl-3-(pyrrole-2-yl/indole-3-yl)-2-phenyl-2,3-dihydro-isoindolinones in aqueous medium
Source: Royal Society of Chemistry journal article supplement (doi:10.1039/c3ra46168h), 2014-01-01

## Electronics supplementary information

### **Nanodomain cubic cuprous oxide as reusable catalyst in one-pot synthesis of 3-alkyl/aryl-3-(pyrrole-2-yl)-2-phenyl-2,3-dihydro-isoindolinones and 3-alkyl/aryl-3-(indole-3-yl)-2-phenyl-2,3-dihydro-isoindolinones in aqueous medium**

**Swarbhanu Sarkar,<sup>a,\$</sup> Nivedita Chatterjee,<sup>a,\$</sup> Manas Roy,<sup>b,\$</sup> Rammyani Pal,<sup>a,\$</sup> Sabyasachi Sarkar,<sup>c</sup> Asish Kumar Sen,<sup>a,\*</sup>**

<sup>a</sup>*Chemistry Division, CSIR-Indian Institute of Chemical Biology, 4 Raja S. C. Mullick Road, Jadavpur, Kolkata-700 032, India.*

<sup>b</sup>*Department of Chemistry, Indian Institute of Technology, Kanpur-208016, India.*

<sup>c</sup>*Department of Chemistry, Bengal Engineering and Science University, Shibpur, Howrah-711103, India.*

<sup>\*</sup>*Corresponding author. Fax: +91 33 24735197; Tel: +91 33 24995806.*

*E-Mail: asishksen@yahoo.com; aksen@iicb.res.in (A. K. Sen)*

<sup>\$</sup>*Contributed equally to the work*

| <b>Content</b>                                              | <b>Page No.</b> |
|-------------------------------------------------------------|-----------------|
| Spectral data of compounds ( <b>5a-5k</b> )                 | S-2             |
| <sup>1</sup> H and <sup>13</sup> C NMR Spectra              | S-5             |
| SEM image of cuprous oxide nanomaterials (500 nm scale bar) | S-16            |
| X-ray data                                                  | S-17            |

**Compound 5a:**  $^1\text{H}$  NMR (DMSO- $d_6$ ; 300 MHz) :  $\delta$  = 3.59 (d, 1 H,  $J$  = 14.1 Hz), 3.95 (d, 1 H,  $J$  = 14.1 Hz), 6.08 (s, 1H), 6.40-6.46 (m, 3 H), 6.70 (s, 1 H), 6.93-7.06 (m, 5 H), 7.18 (t, 2 H,  $J$  = 9 Hz), 7.43-7.47 (m, 2 H), 7.57-7.65 (m, 2H), 10.74 (s, 1 H) ppm;  $^{13}\text{C}$  NMR (DMSO- $d_6$ ; 75 MHz) :  $\delta$  = 69.07, 106.87, 107.88, 114.94, 115.24, 119.44, 123.10, 123.24, 126.31, 126.41, 126.68, 127.38, 128.42, 130.00, 130.59, 130.71, 132.25, 133.43, 134.24, 147.95, 157.79, 161.01, 166.93 ppm; HRMS (ESI):  $m/z$  calcd for  $\text{C}_{25}\text{H}_{19}\text{FN}_2\text{O}$  [ $\text{M}+\text{Na}$ ] $^+$ 405.1379; found: 405.1384.

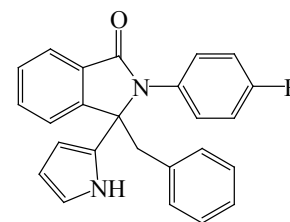

**Compound 5b:**  $^1\text{H}$  NMR (DMSO- $d_6$ ; 300 MHz) :  $\delta$  = 3.59 (d, 1 H,  $J$  = 14.1 Hz), 3.93 (d, 1 H,  $J$  = 14.1 Hz), 6.09 (s, 1H), 6.39-6.49 (m, 3 H), 6.71 (s, 1H), 6.80 (t, 2 H,  $J$  = 8.7 Hz), 6.99-7.04 (m, 2 H), 7.18 (t, 2 H,  $J$  = 8.7 Hz), 7.46 (t, 2 H,  $J$  = 7.2 Hz), 7.59-7.65 (m, 2 H), 10.75 (s, 1H) ppm;  $^{13}\text{C}$  NMR (DMSO- $d_6$ ; 75 MHz) :  $\delta$  = 68.97, 106.89, 107.85, 114.03, 114.31, 115.01, 115.31, 119.46, 123.11, 123.21, 126.19, 126.30, 128.50, 130.42, 130.46, 130.49, 130.54, 131.68, 131.79, 132.31, 133.34, 133.37, 147.73, 166.86 ppm; HRMS (ESI):  $m/z$  calcd for  $\text{C}_{25}\text{H}_{18}\text{N}_2\text{F}_2\text{O}$  [ $\text{M}+\text{Na}$ ] $^+$ 423.1285; found: 423.1292.

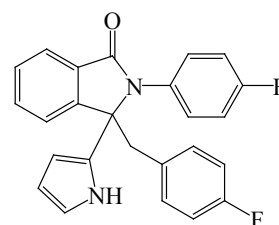

**Compound 5c:**  $^1\text{H}$  NMR (DMSO- $d_6$ ; 300 MHz) :  $\delta$  = 3.54 (d, 1 H,  $J$  = 14.1 Hz), 3.75 (s, 3 H), 3.91 (d, 1 H,  $J$  = 14.1 Hz), 6.07 (s, 1H), 6.34 (s, 1H), 6.50 (d, 2 H,  $J$  = 7.5 Hz), 6.69 (s, 1H), 6.83-7.03 (m, 7 H), 7.43 (t, 2 H,  $J$  = 6.9 Hz), 7.54-7.59 (m, 2 H), 10.69 (s, 1H) ppm;  $^{13}\text{C}$  NMR (DMSO- $d_6$ ; 75 MHz) :  $\delta$  = 55.17, 68.92, 106.86, 107.70, 113.49, 119.23, 122.92, 123.24, 126.18, 126.56, 127.31, 128.26, 129.67, 130.07, 130.89, 130.97, 131.87, 134.45, 147.87, 156.76, 166.71 ppm; HRMS (ESI):  $m/z$  calcd for  $\text{C}_{26}\text{H}_{22}\text{N}_2\text{O}_2$  [ $\text{M}+\text{Na}$ ] $^+$ 417.1579; found: 417.1573.

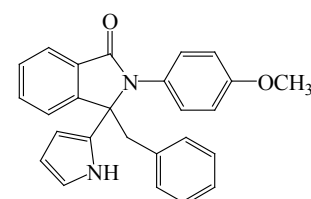

**Compound 5d:**  $^1\text{H}$  NMR (DMSO- $d_6$ ; 600 MHz) :  $\delta$  = 3.07 (d, 1 H,  $J$  = 9 Hz), 3.28 (s, 3H), 3.59 (d, 1 H,  $J$  = 6 Hz), 3.71 (s, 3H), 5.95 (s, 1H), 6.08 (s, 1H), 6.65-6.71 (m, 3 H), 6.84-6.86 (m, 2 H), 7.32 (d, 1 H,  $J$  = 3 Hz), 7.48-7.56 (m, 2 H), 7.75 (d, 1 H,  $J$  = 3 Hz), 10.66 (s, 1H) ppm;  $^{13}\text{C}$  NMR (DMSO- $d_6$ ; 150 MHz) :  $\delta$  = 37.94, 51.56, 55.61, 66.38, 107.83, 114.25, 119.88, 123.04, 123.37, 128.74, 128.77, 129.01, 129.90, 132.03, 132.41, 147.90, 158.38, 167.65, 169.08 ppm; HRMS (ESI):  $m/z$  calcd for  $\text{C}_{22}\text{H}_{20}\text{N}_2\text{O}_4$   $[\text{M}+\text{Na}]^+$ +399.1321; found: 399.1325.

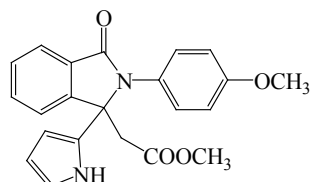

**Compound 5e:**  $^1\text{H}$  NMR (DMSO- $d_6$ ; 300 MHz) :  $\delta$  = 5.99 (s, 1H), 6.12 (s, 1H), 6.66 (s, 1H), 6.95-6.99 (m, 2 H), 7.16 (t, 2 H,  $J$  = 8.7 Hz), 7.30 (d, 1 H,  $J$  = 7.5 Hz), 7.50-7.63 (m, 2 H), 7.81 (d, 1 H,  $J$  = 7.2 Hz), 10.66 (s, 1H) ppm;  $^{13}\text{C}$  NMR (DMSO- $d_6$ ; 75 MHz) :  $\delta$  = 3.37, 4.64, 38.16, 69.17, 106.82, 107.57, 115.15, 119.17, 122.93, 123.16, 127.48, 127.59, 128.23, 130.54, 130.87, 132.15, 132.99, 133.03, 148.84, 158.28, 167.24 ppm; HRMS (ESI):  $m/z$  calcd for  $\text{C}_{22}\text{H}_{19}\text{N}_2\text{FO}$   $[\text{M}+\text{Na}]^+$ +369.1379; found: 369.1386.

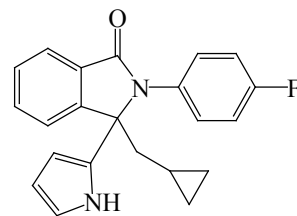

**Compound 5f:**  $^1\text{H}$  NMR (DMSO- $d_6$ ; 300 MHz) :  $\delta$  = 3.23 (s, 3H), 3.36-3.63 (m, 7 H), 4.64 (t, 1 H,  $J$  = 7.5 Hz), 5.86 (s, 1H), 5.93 (s, 1H), 6.48 (d, 2 H,  $J$  = 7.2 Hz), 6.56 (d, 1 H,  $J$  = 7.5 Hz), 6.69 (s, 1H), 6.99-7.48 (m, 5 H), 7.64 (d, 1 H,  $J$  = 7.5 Hz), 10.59 (s, 1H) ppm;  $^{13}\text{C}$  NMR (DMSO- $d_6$ ; 75 MHz) :  $\delta$  = 35.17, 41.21, 51.65, 57.06, 67.71, 107.09, 109.13, 119.02, 122.60, 124.41, 126.56, 127.54, 128.05, 128.26, 128.46, 129.57, 130.04, 130.92, 132.04, 135.66, 138.26, 146.58, 167.16, 169.92 ppm; HRMS (ESI):  $m/z$  calcd for  $\text{C}_{25}\text{H}_{24}\text{N}_2\text{O}_5$   $[\text{M}+\text{Na}]^+$ +455.1583; found: 455.1587.

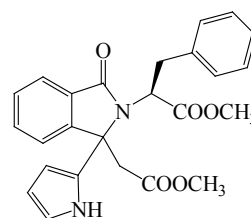

**Compound 5g:**  $^1\text{H}$  NMR ( $\text{CDCl}_3$ ; 300 MHz): 0.27-0.36 (m, 1 H), 0.48-0.58 (m, 1 H), 0.83-1.19 (m, 2 H), 2.59-2.66 (m, 1 H), 3.64 (s, 1H), 3.68-3.83 (m, 2H), 6.20 (s, 1 H), 6.47-6.57 (m, 5H), 6.77 (s, 1 H), 6.96-7.00 (m, 2H), 7.20-7.26 (m, 1H), 7.34-7.39 (m, 1H), 8.93 (1H, brs) ppm;  $^{13}\text{C}$  NMR ( $\text{CDCl}_3$ ; 75 MHz) :  $\delta$  = 2.51, 5.84, 24.02, 39.96, 55.01, 69.03,

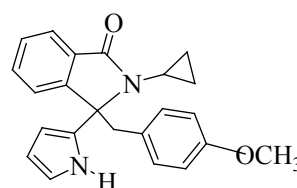

107.04, 108.14, 113.17, 113.26, 118.84, 122.47, 122.74, 126.20, 128.30, 130.81, 130.97, 131.26, 131.45, 148.11, 158.30, 170.15 ppm; HRMS (ESI):  $m/z$  calcd for  $C_{23}H_{22}N_2O_2$   $[M+Na]^+$  381.1579; found: 381.1585.

**Compound 5h:**  $^1H$  NMR (300 MHz, DMSO- $d_6$ ):  $\delta$  = 3.85 (d, 1H,  $J$  = 14.1 Hz), 4.11 (d, 1H,  $J$  = 14.1 Hz), 6.48 (d, 2H,  $J$  = 7.2 Hz), 6.56 (d, 1H,  $J$  = 8.1 Hz), 6.68 (t, 1H,  $J$  = 7.8 Hz), 6.93-7.14 (m, 5 H), 7.24 (d, 4H,  $J$  = 3.9 Hz), 7.35-7.47 (m, 3H), 7.54-7.64 (m, 2H), 7.92 (s, 1H), 11.34 (s, 1H) ppm; ESI MS:  $[M+Na]^+$  437.48

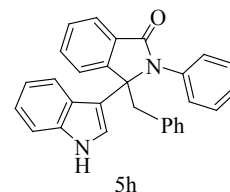

**Compound 5i:**  $^1H$  NMR (300 MHz,  $CDCl_3$ ):  $\delta$  = 3.82 (d, 1H,  $J$  = 13.5 Hz), 3.94 (d, 1H,  $J$  = 13.8 Hz), 6.55 (d, 2H,  $J$  = 7.5 Hz), 6.99 (t, 2H,  $J$  = 7.8 Hz), 7.07-7.22 (m, 6H), 7.39 (d, 2H,  $J$  = 9 Hz), 7.48-7.53 (m, 2H), 7.60 (d, 2H,  $J$  = 7.0 Hz), 7.91-7.94 (m, 1H), 8.03 (dd, 1H,  $J$  = 2.1, 8.5 Hz), 8.85 (brs, 1H) ppm; ESI MS:  $[M+H]^+$  460.74

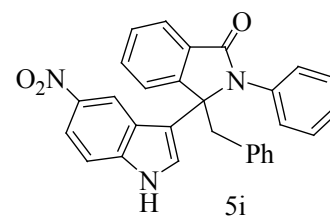

**Compound 5j:**  $^1H$  NMR (300 MHz,  $CDCl_3$ ):  $\delta$  = 3.43 (s, 3H), 3.77 (d, 1H,  $J$  = 13.8 Hz), 3.91 (d, 1H,  $J$  = 13.8 Hz), 6.11 (s, 1H), 6.53 (d, 2H,  $J$  = 7.2 Hz), 6.76 (dd, 1H,  $J$  = 2.4, 9 Hz), 6.98 (t, 2H,  $J$  = 7.3 Hz), 7.05-7.10 (m, 3H), 7.13-7.29 (m, 5H), 7.42-7.54 (m, 3H), 7.85 (d, 1H,  $J$  = 7.5 Hz), 8.23 (brs, 1H) ppm; ESI MS:  $[M+H]^+$  445.63

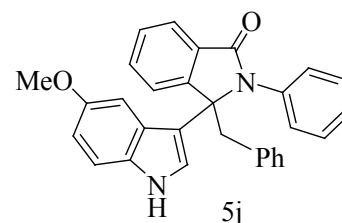

**Compound 5k:**  $^1H$  NMR (300 MHz,  $CDCl_3$ ):  $\delta$  = 2.24 (s, 3H), 3.88 (d, 1H,  $J$  = 13.5 Hz), 4.09 (d, 1H,  $J$  = 13.5 Hz), 6.38 (d, 2H,  $J$  = 7.2 Hz), 6.94 (t, 2H,  $J$  = 7.5 Hz), 7.07 (t, 1H,  $J$  = 7.2 Hz), 7.17-7.28 (m, 8H), 7.37-7.45 (m, 2H), 7.54-7.60 (m, 2H), 7.73 (d, 1H,  $J$  = 7.5 Hz), 8.30 (brs, 1H) ppm; ESI MS:  $[M+Na]^+$  451.39

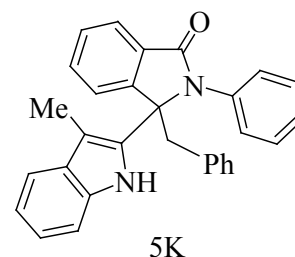

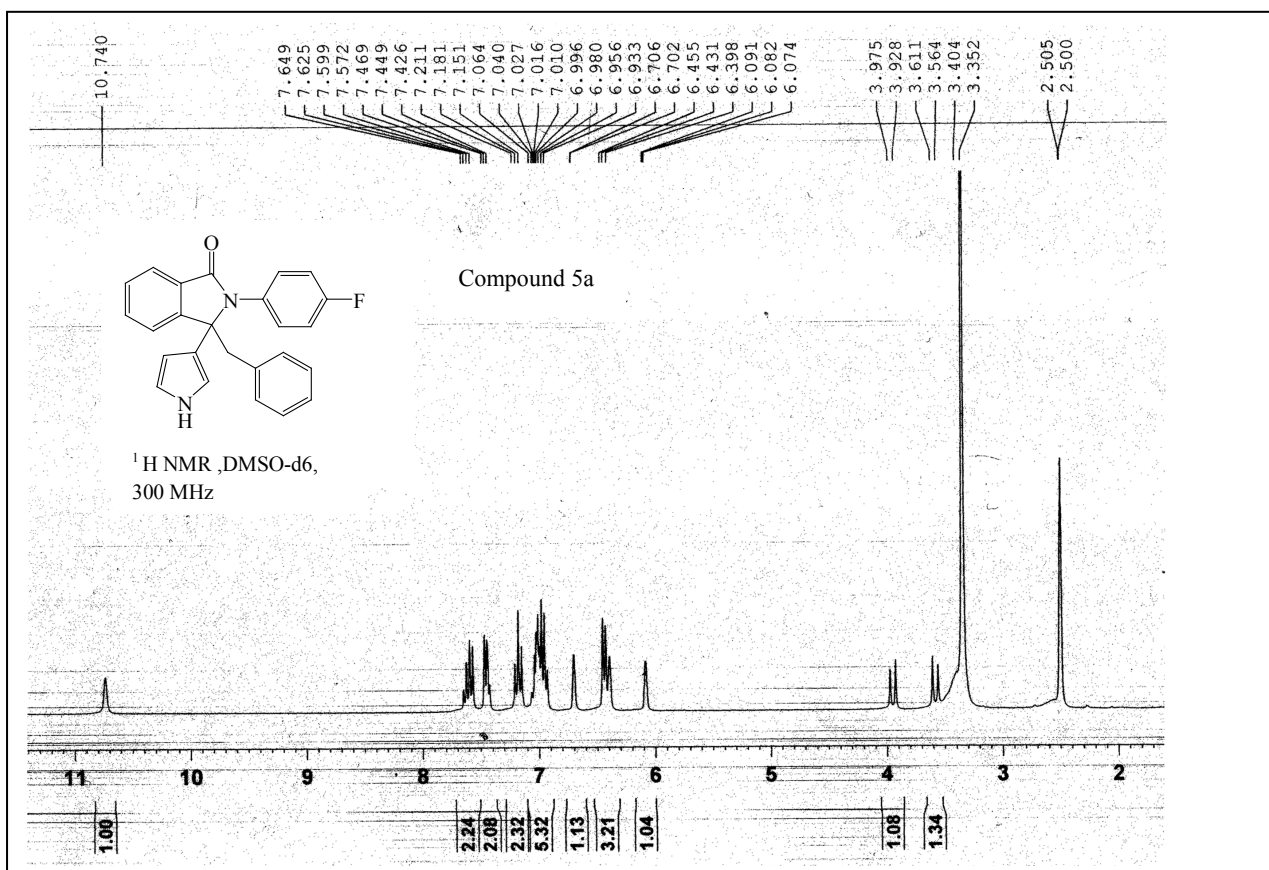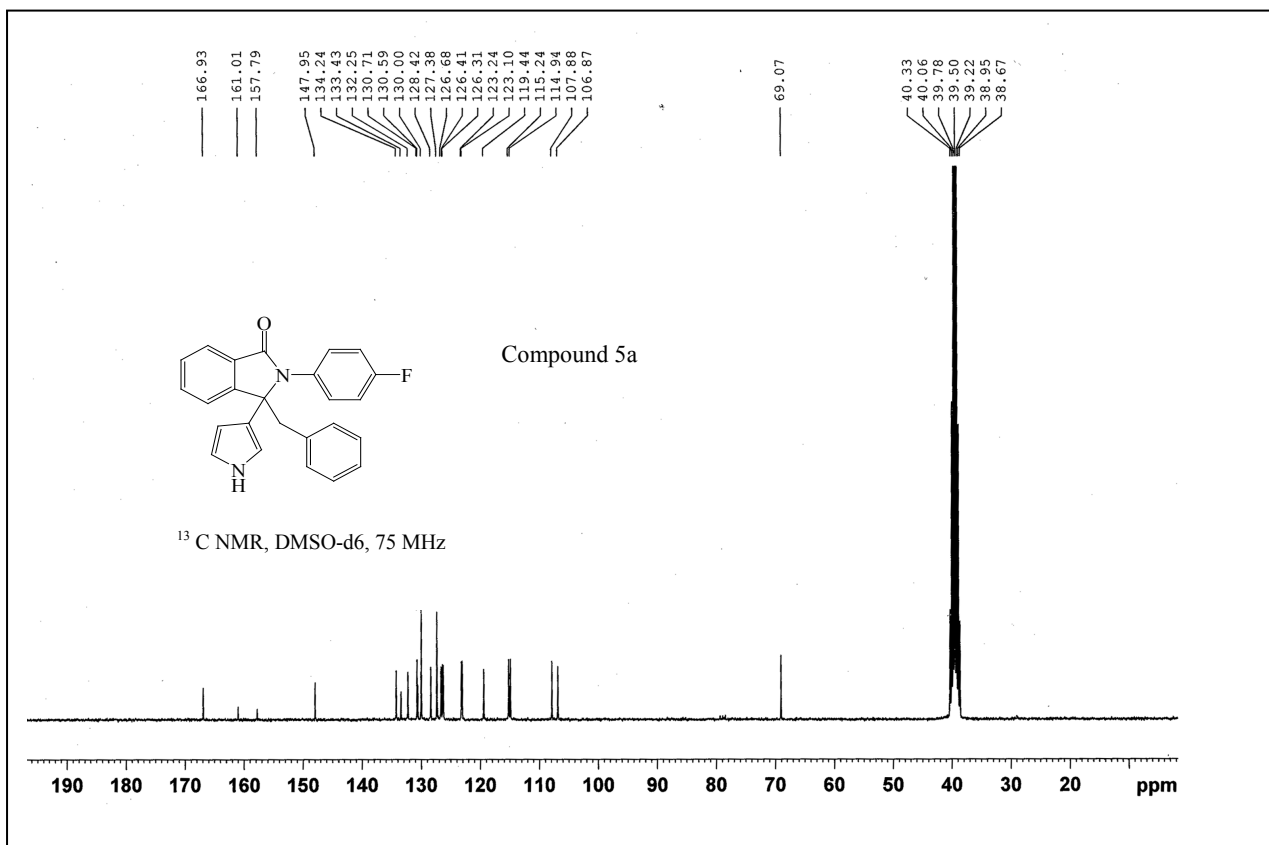

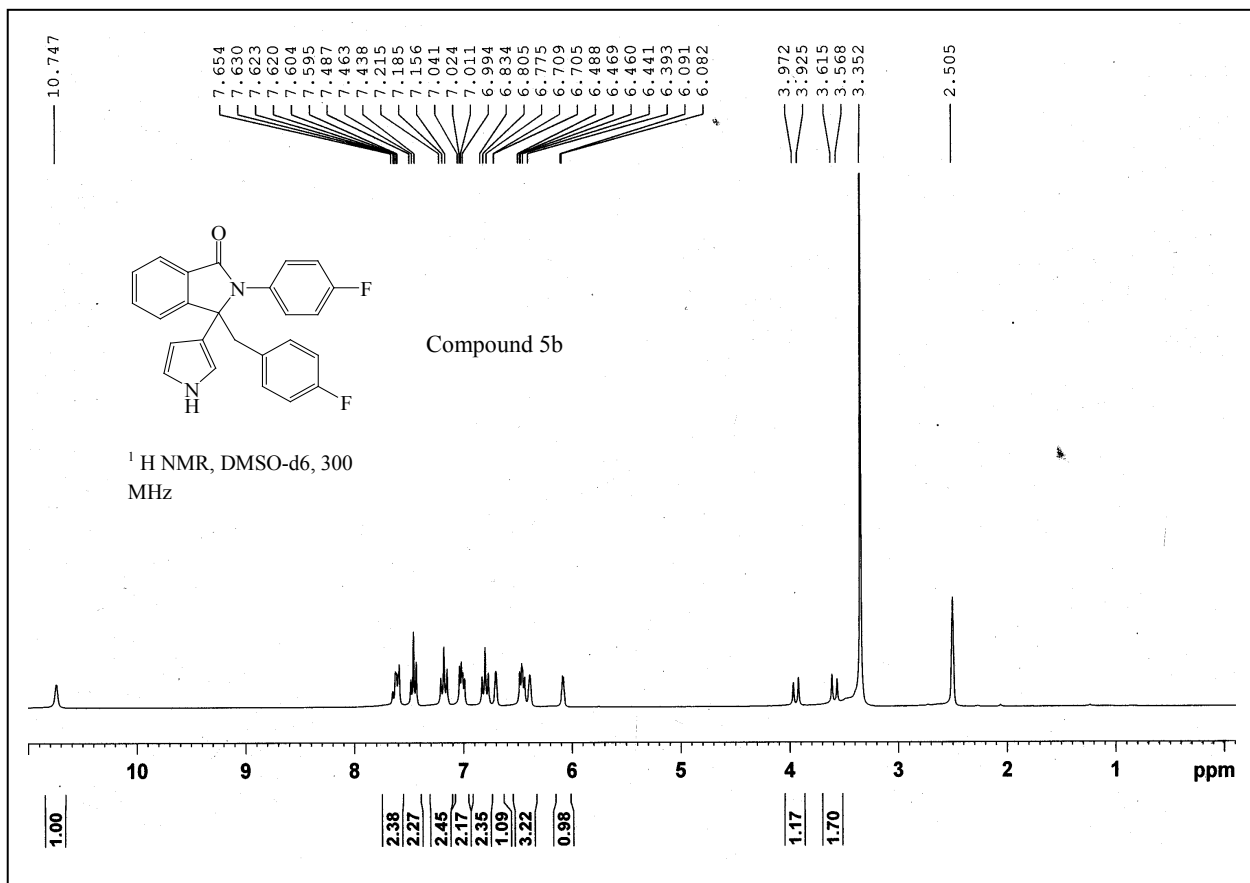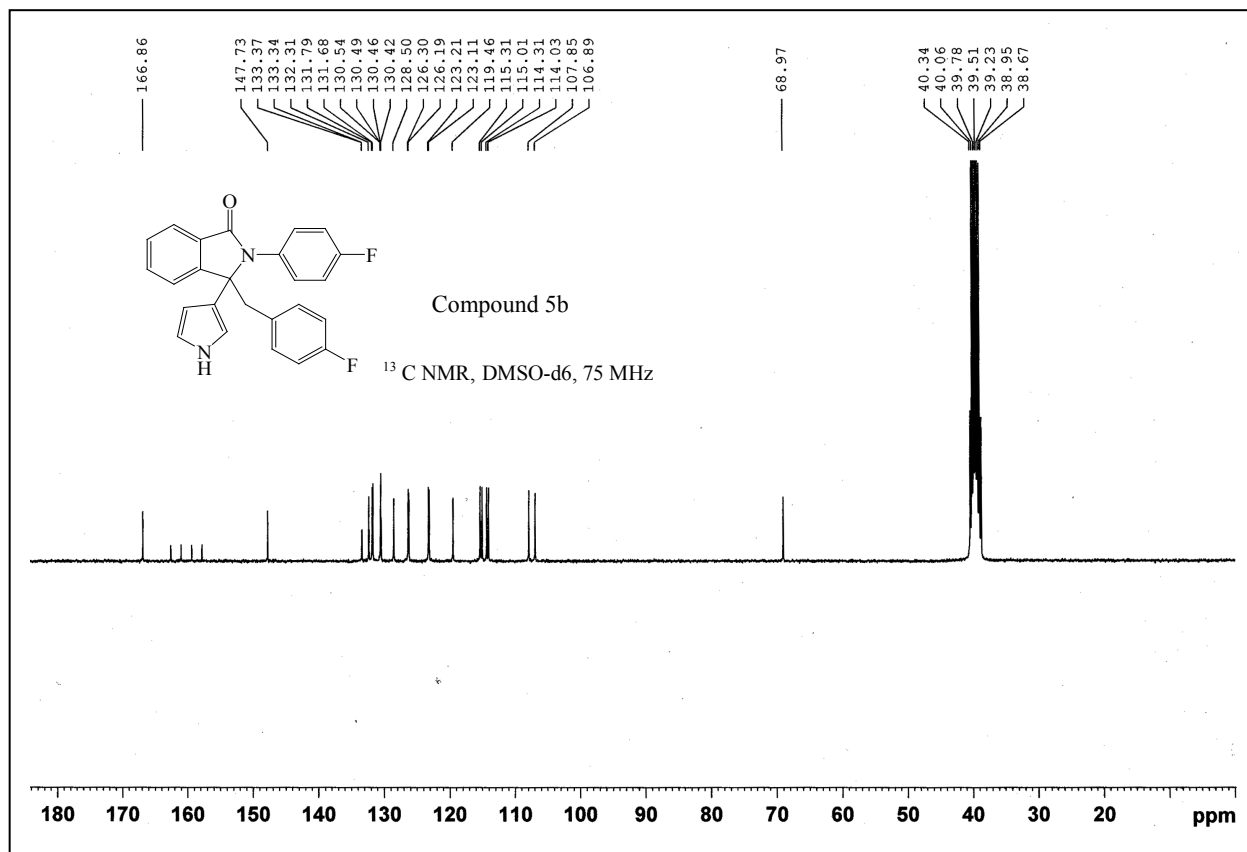

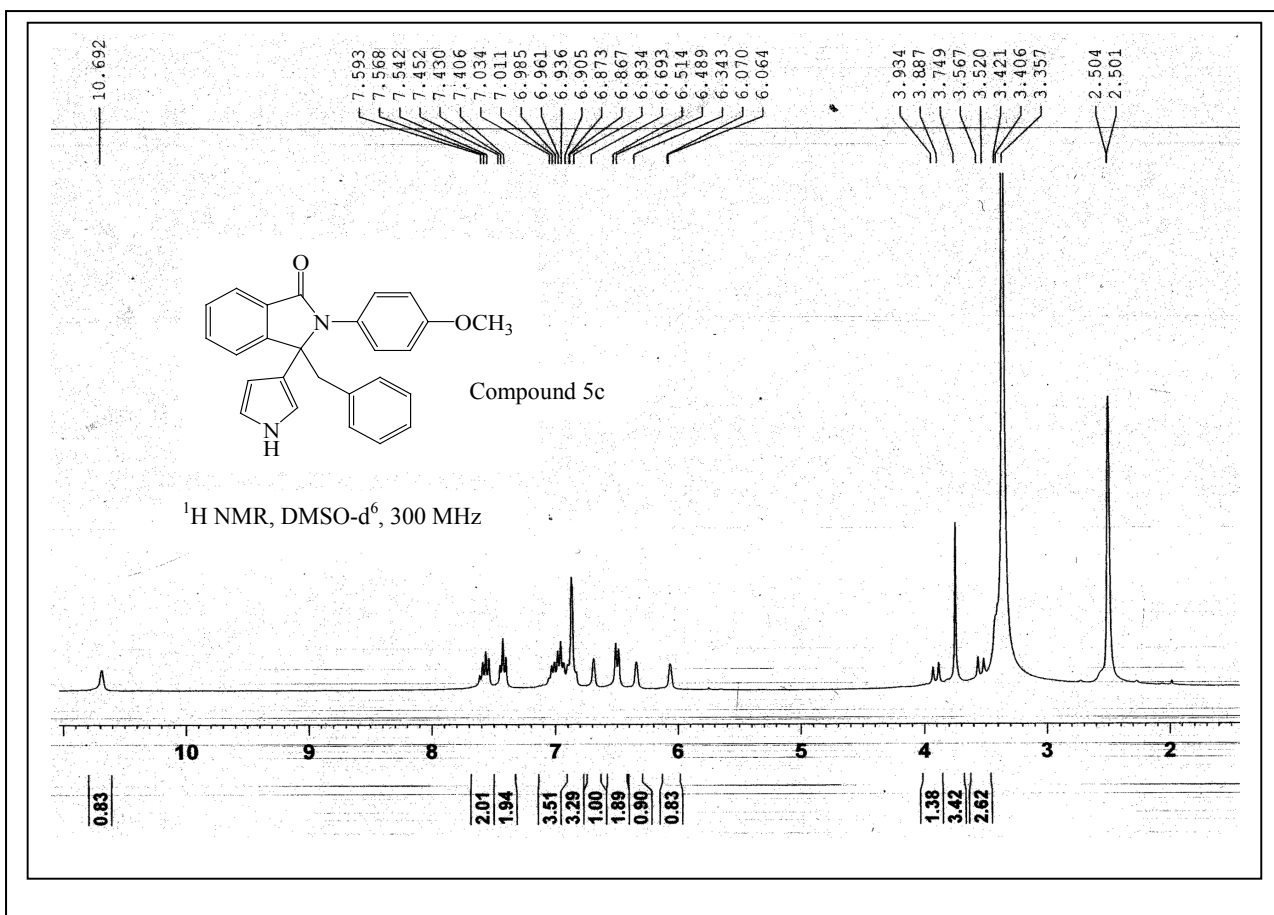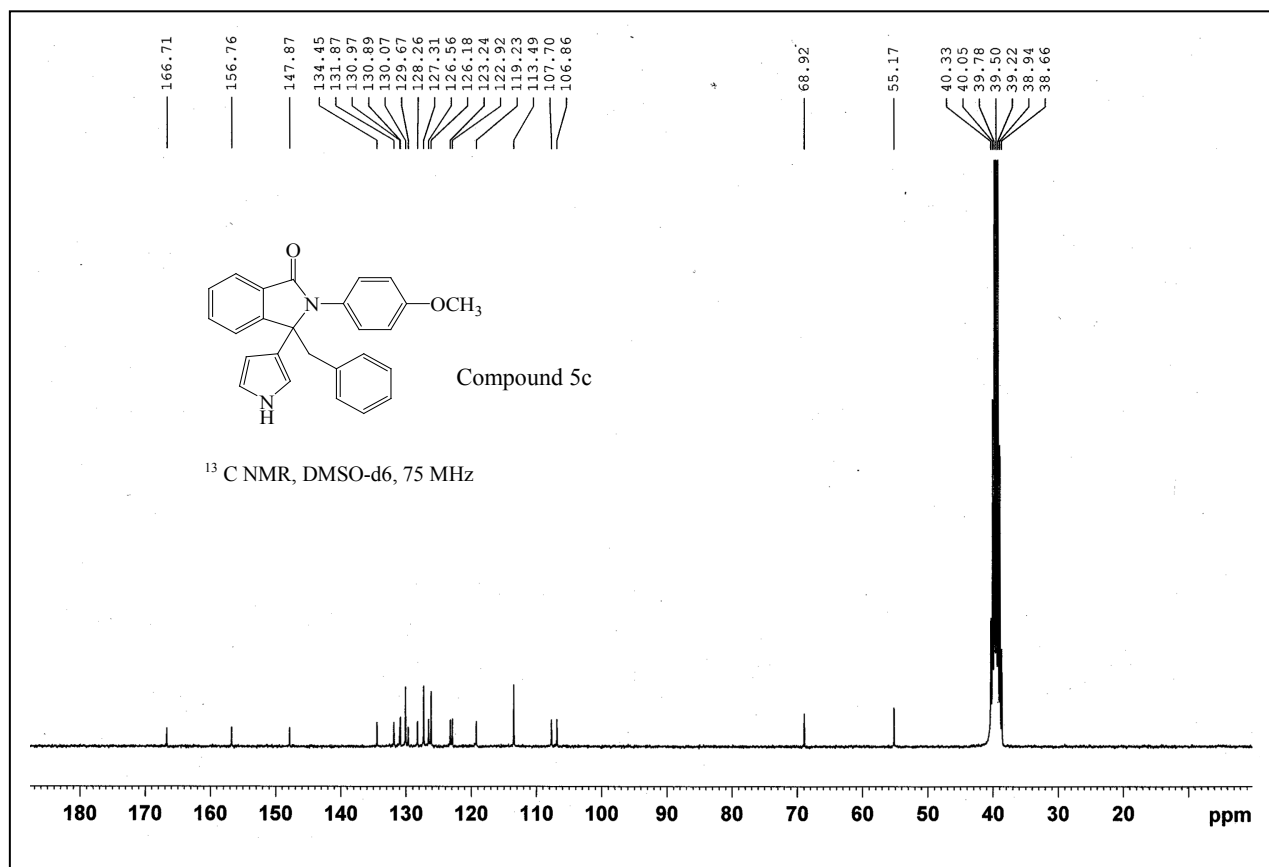

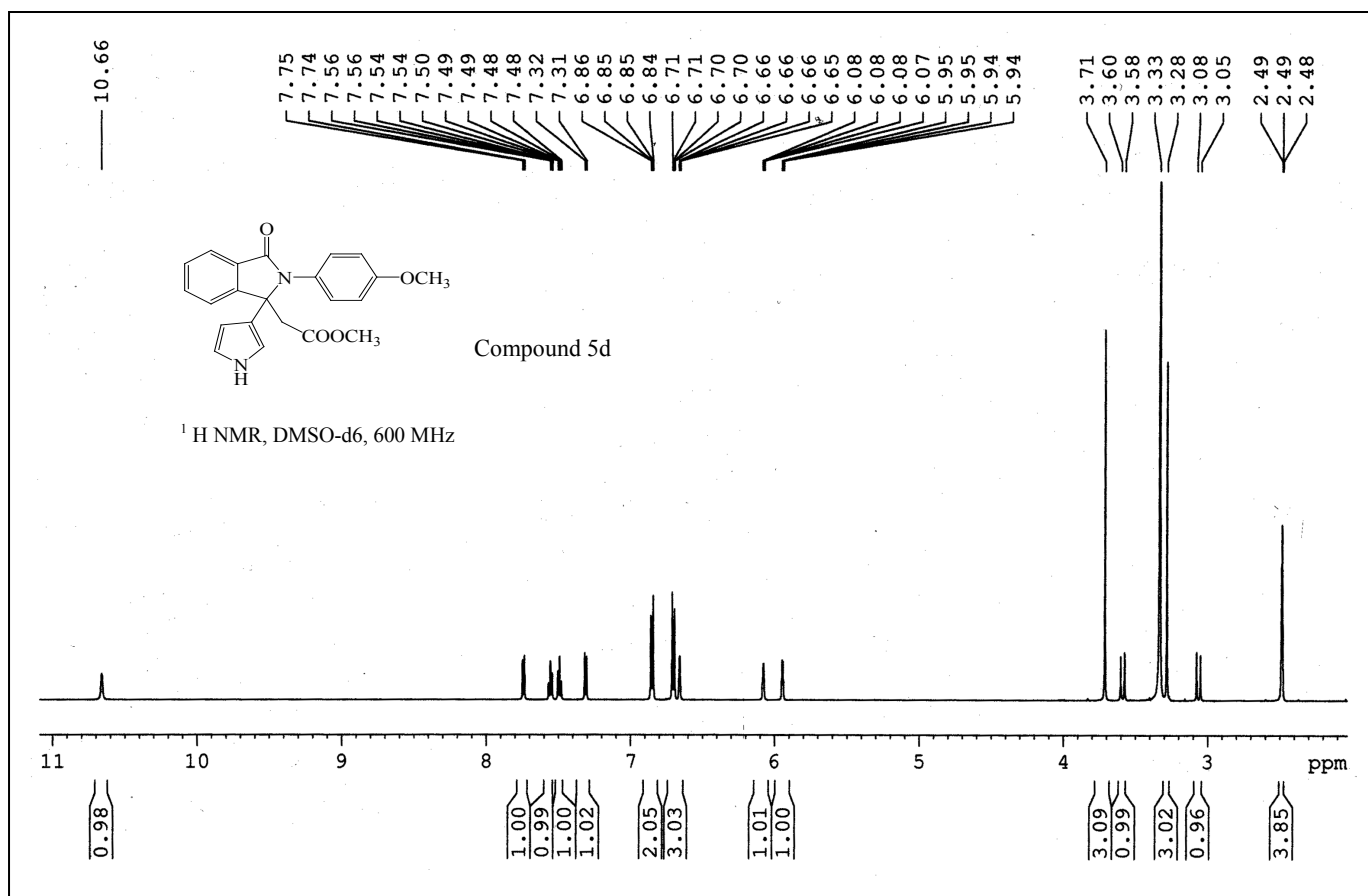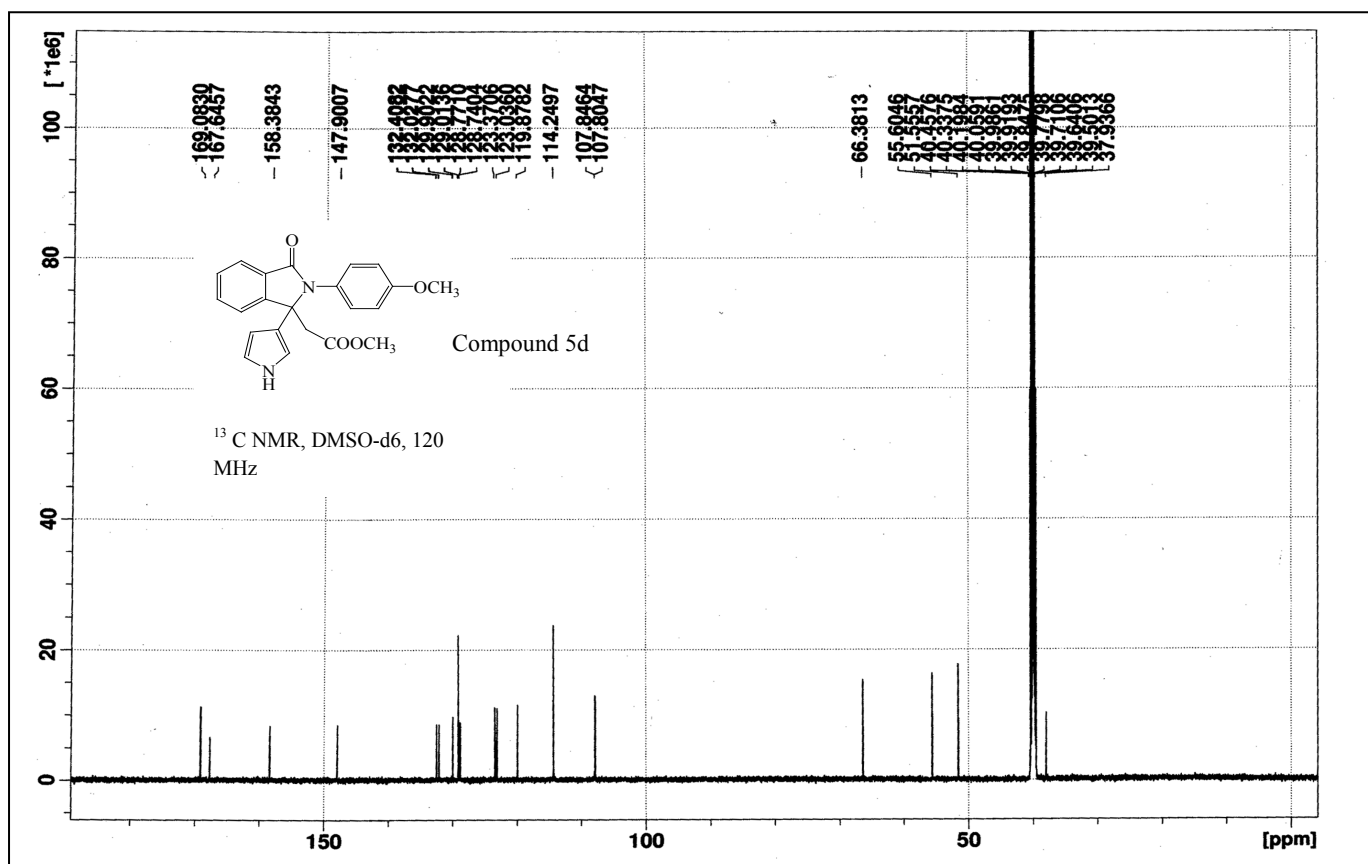



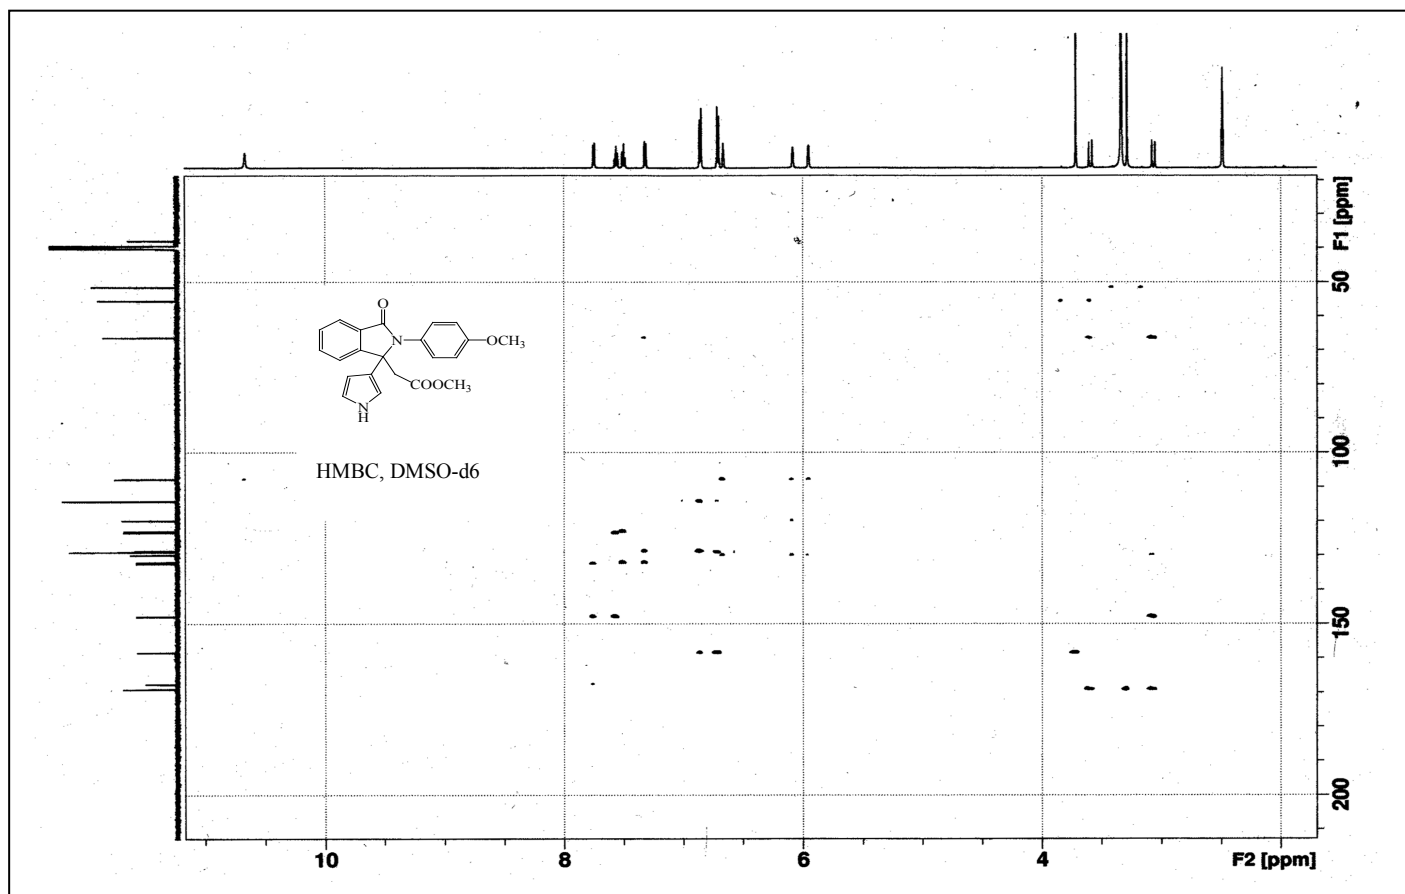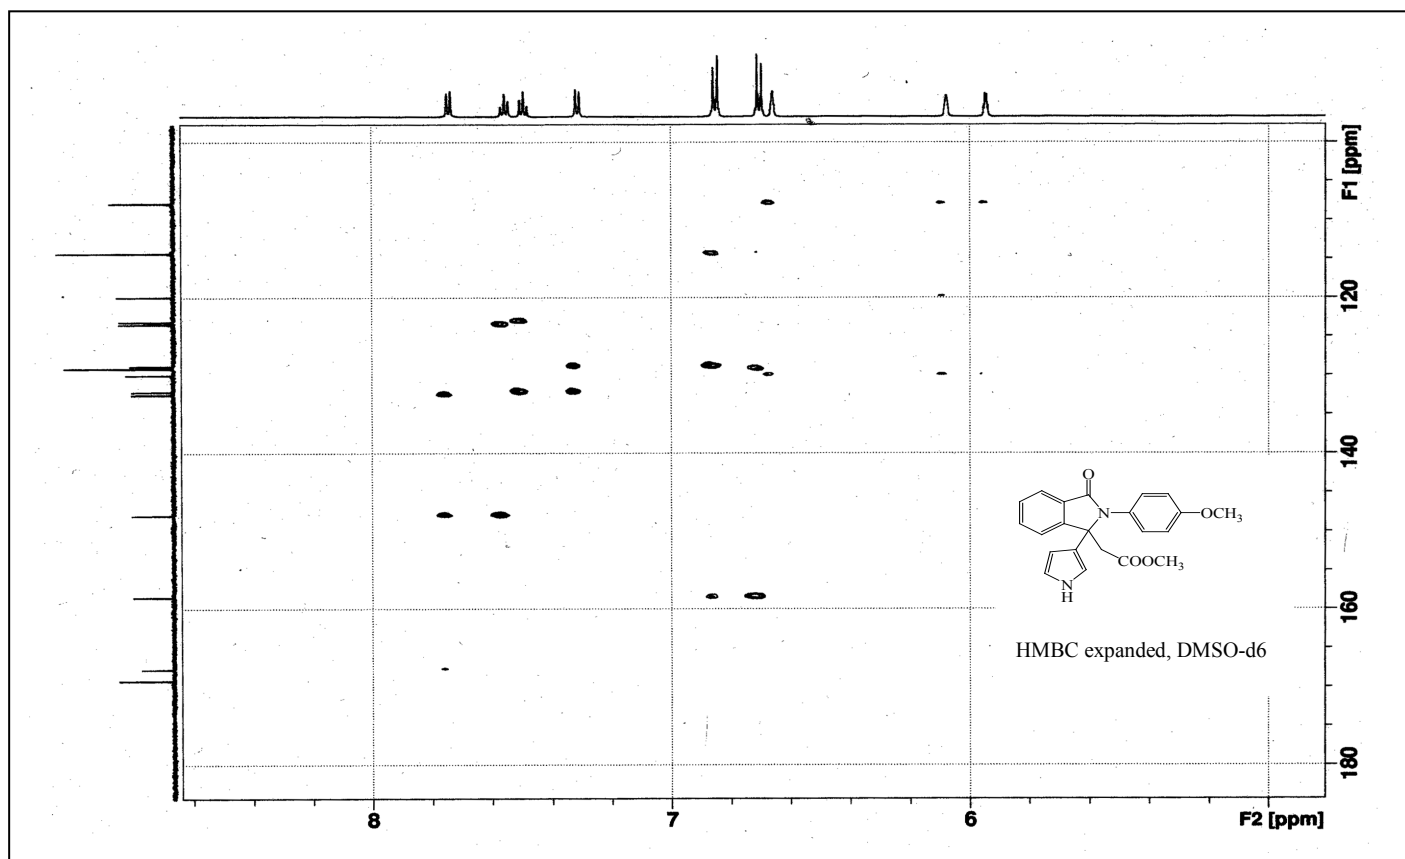

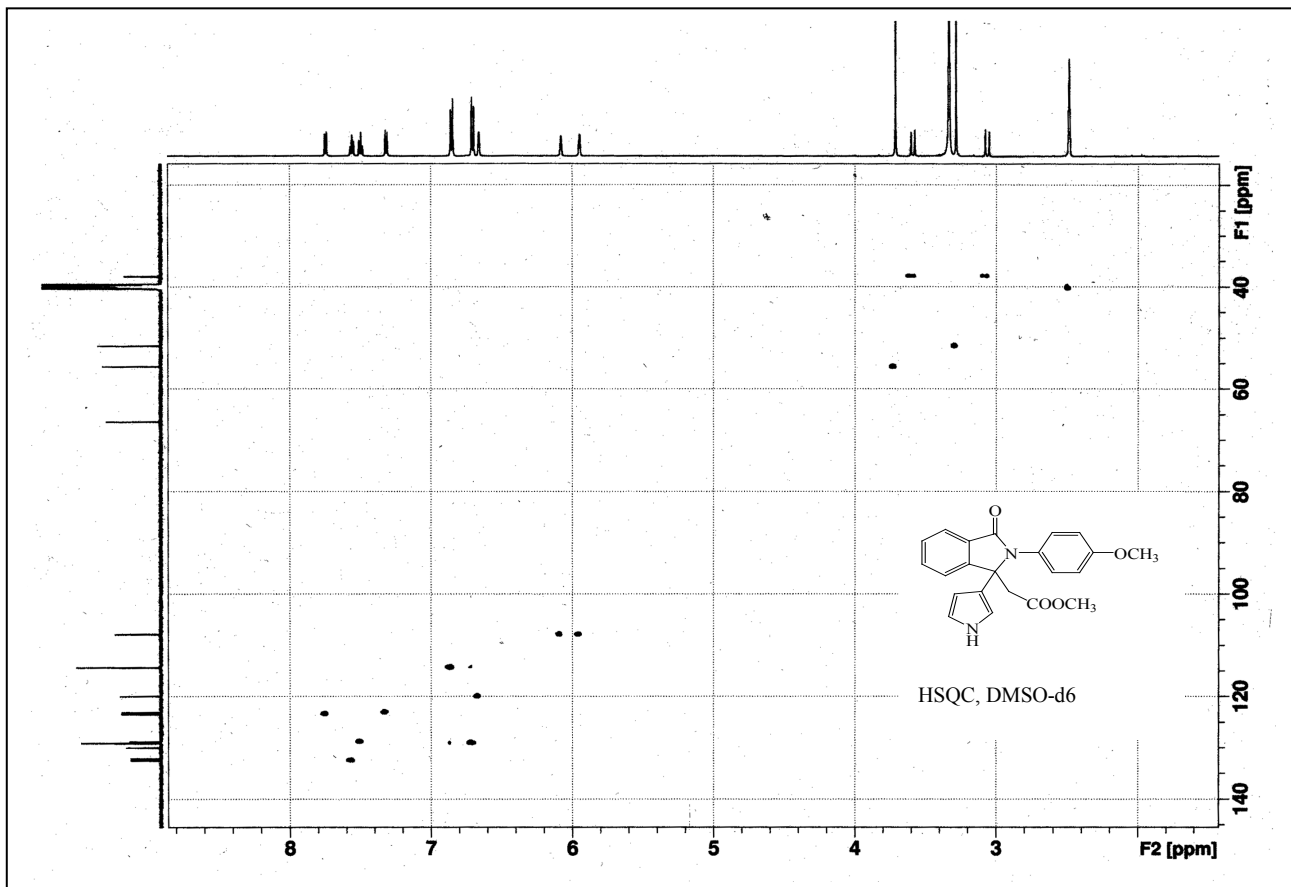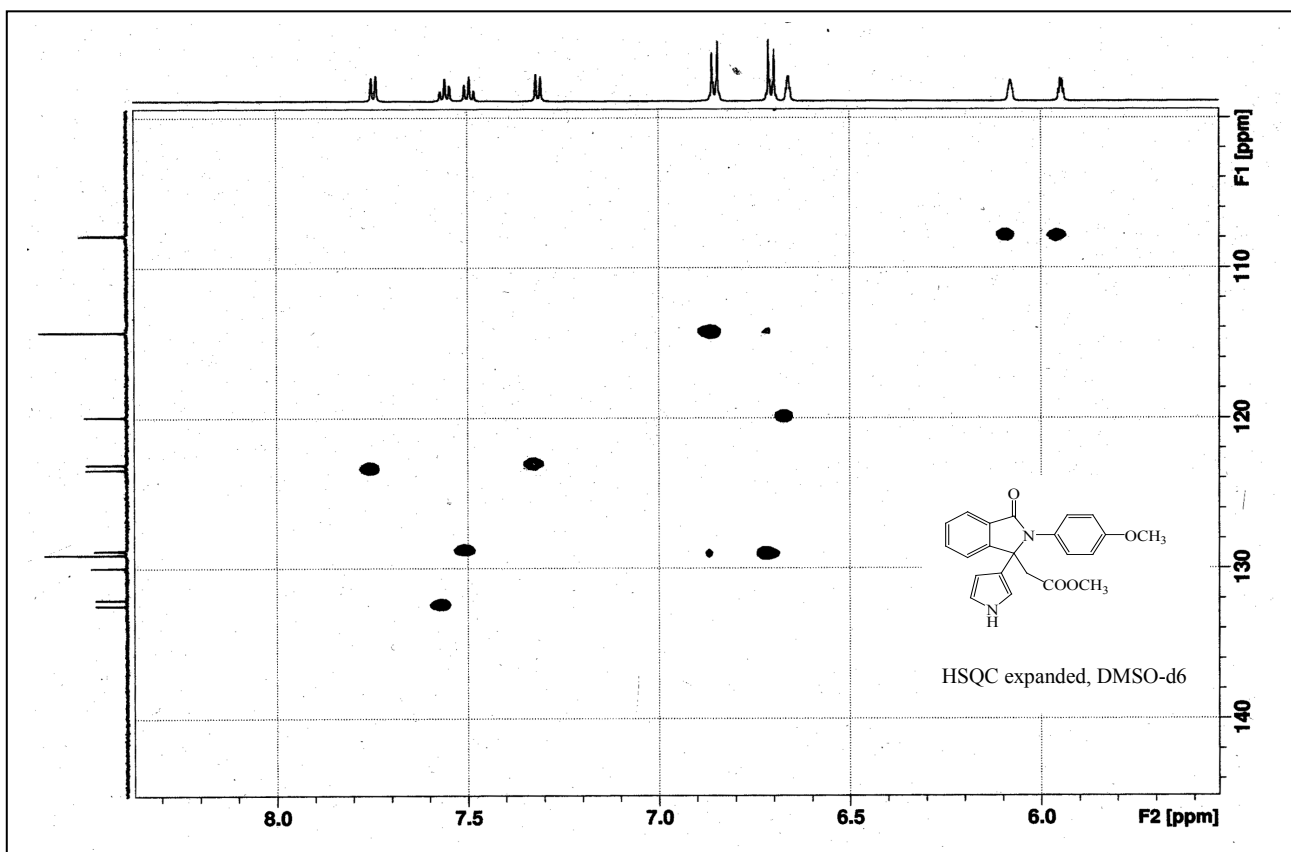

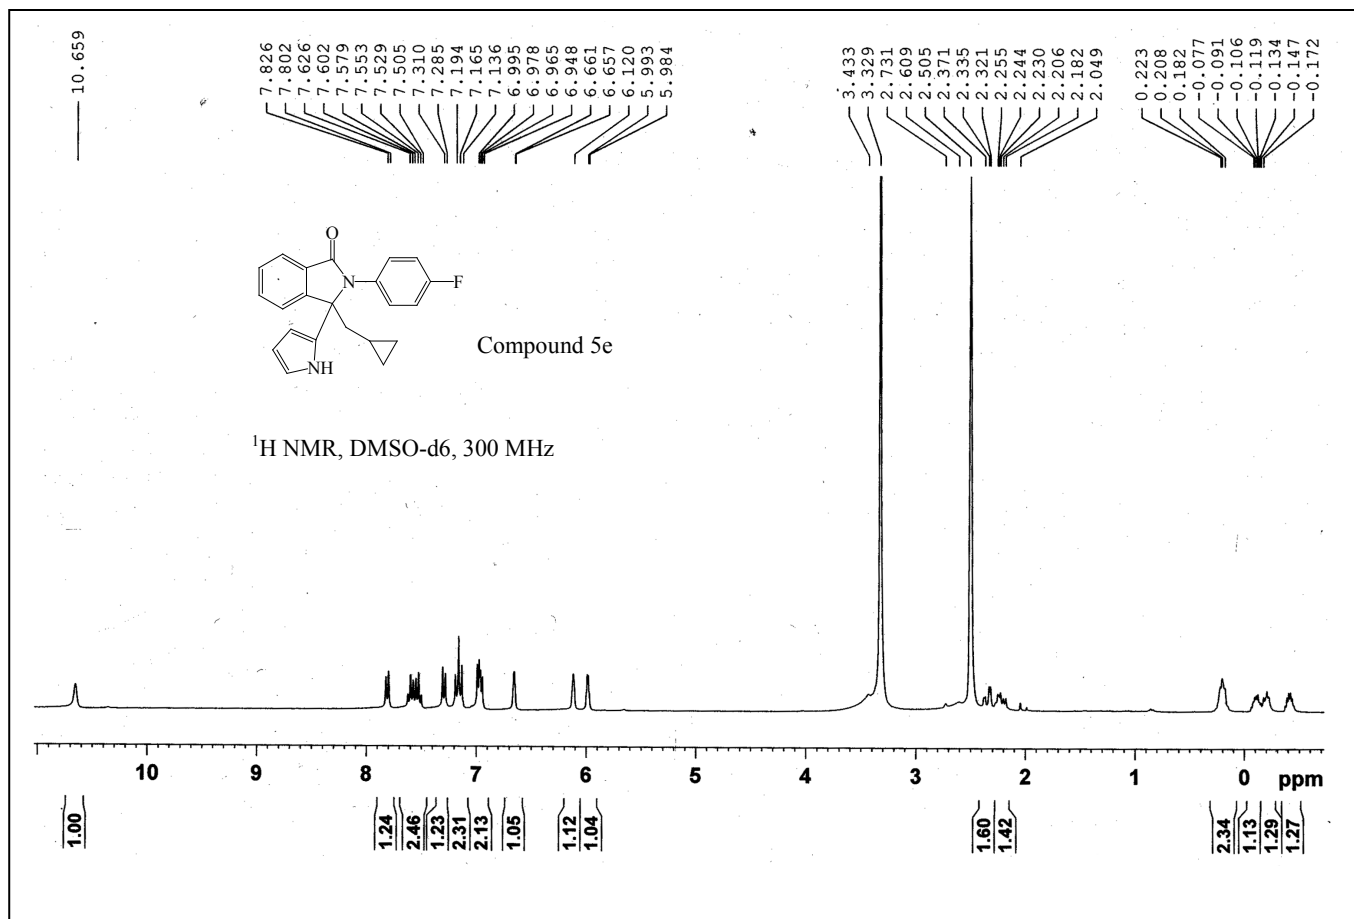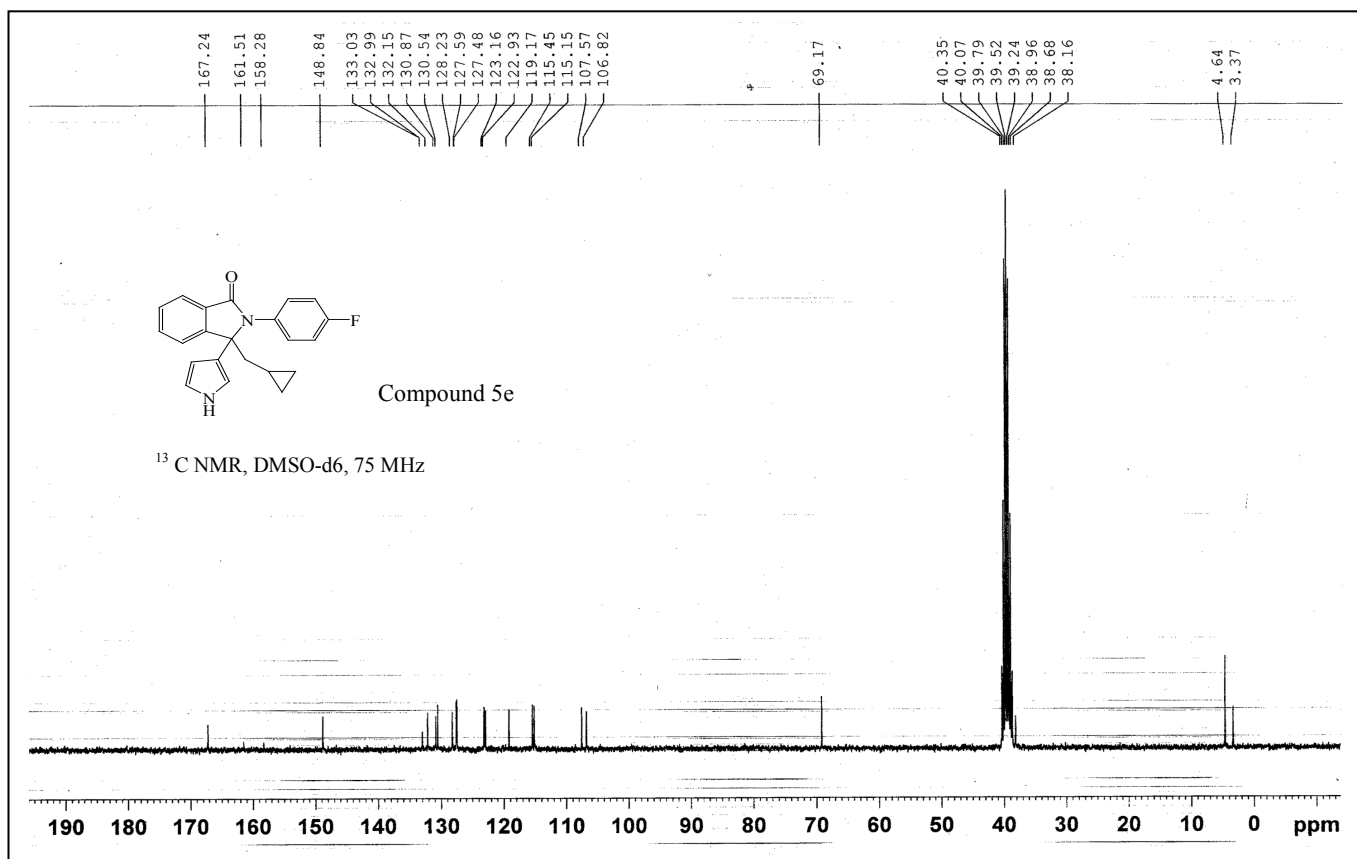

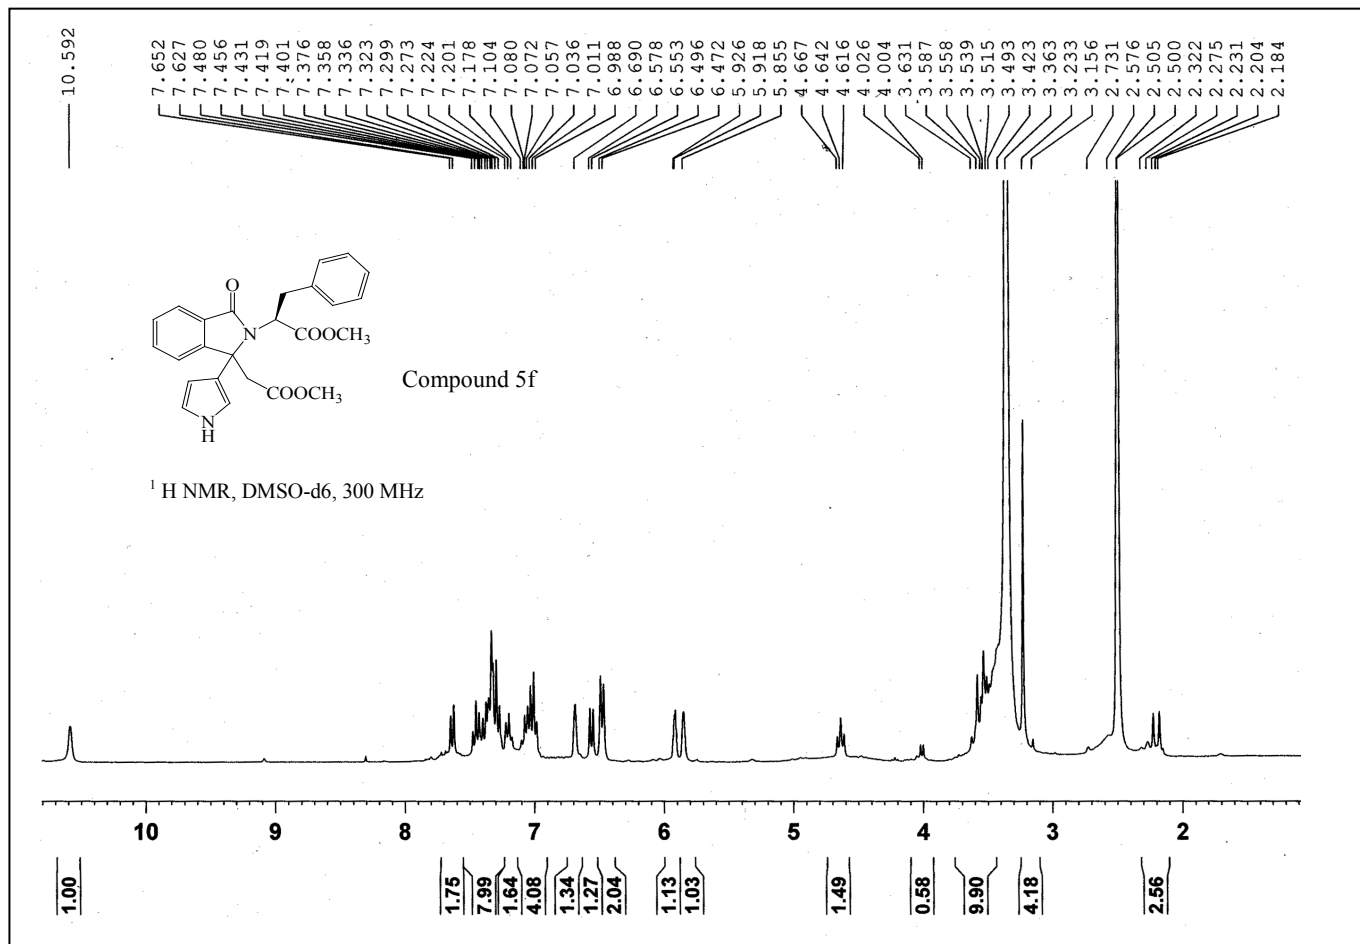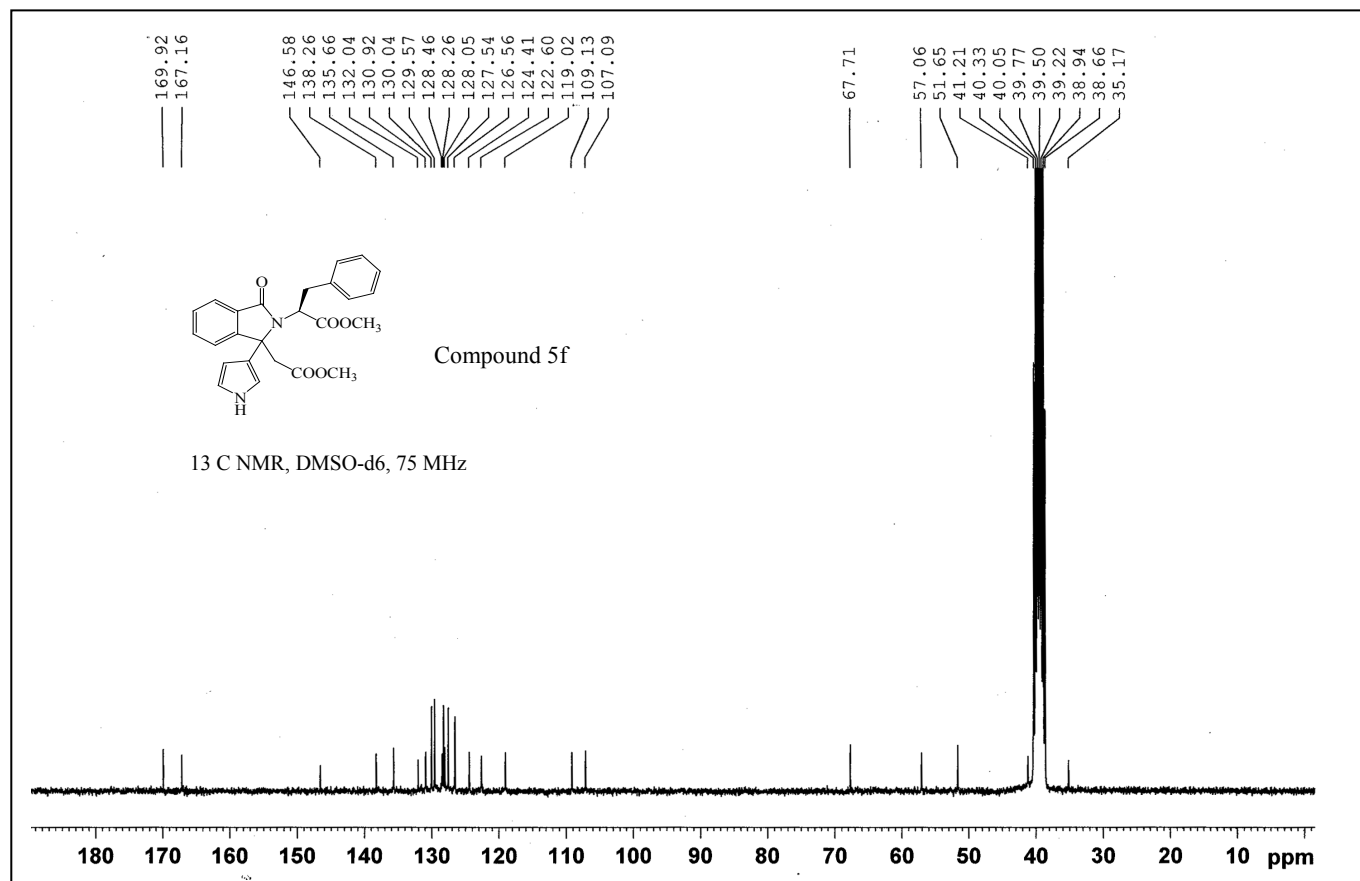

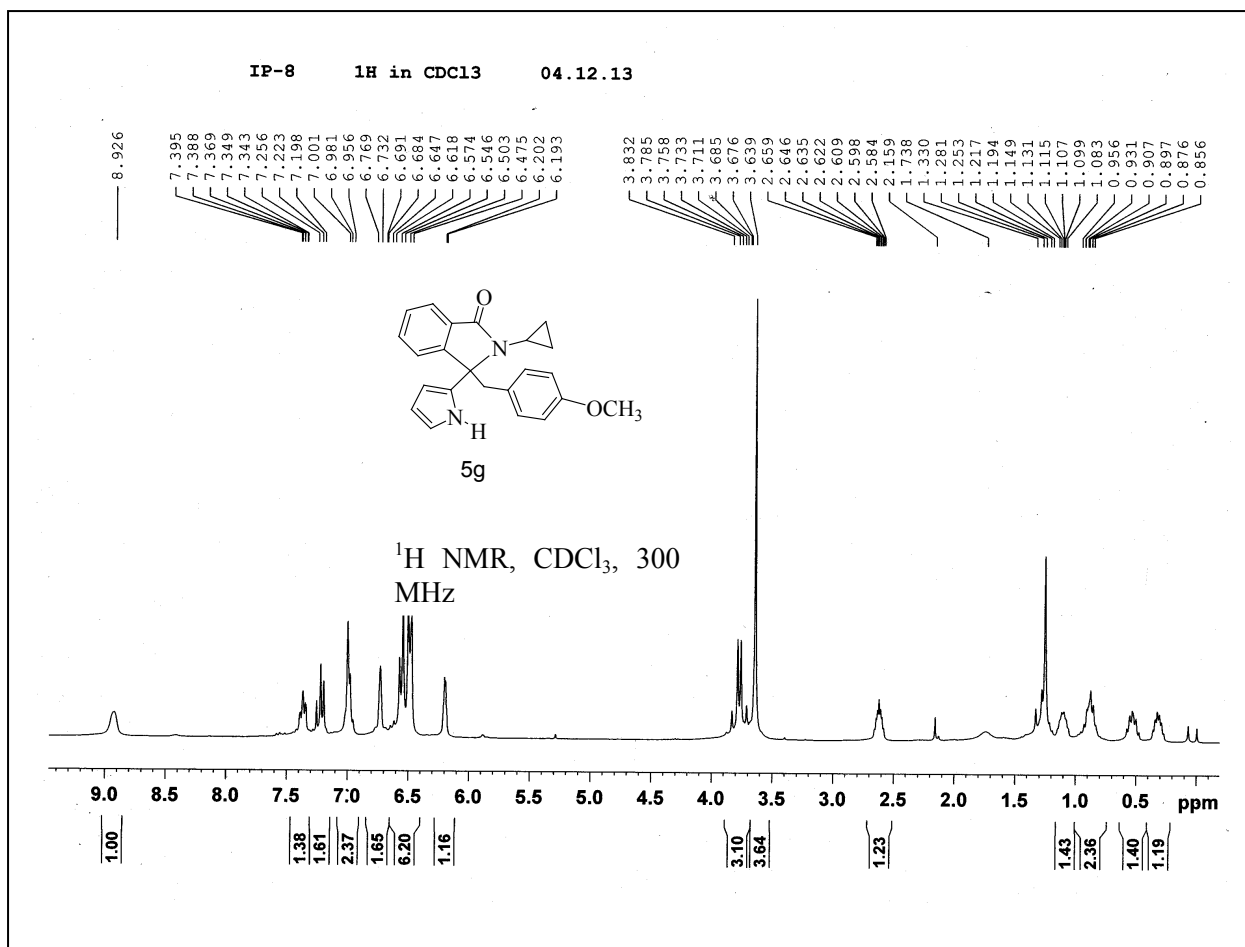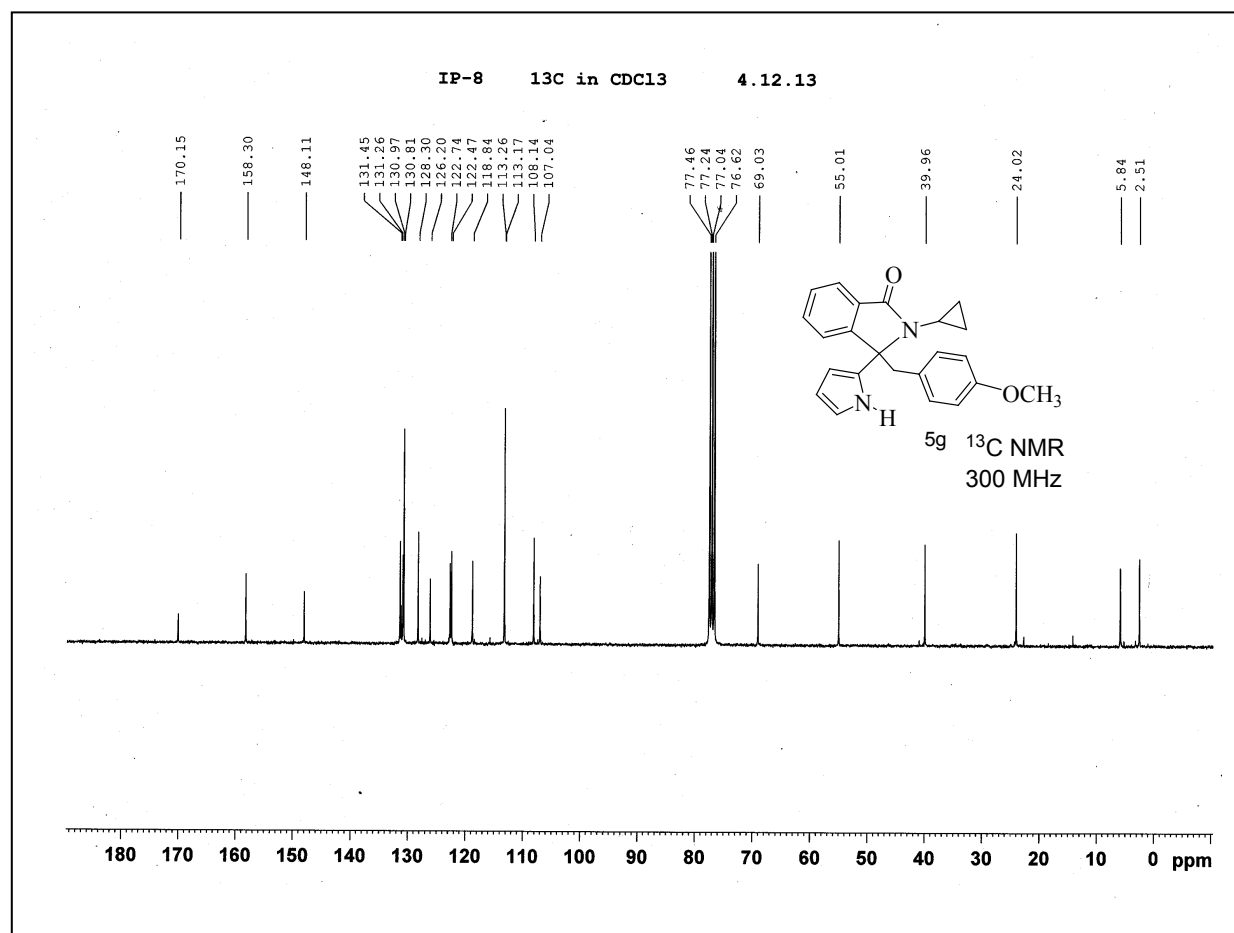

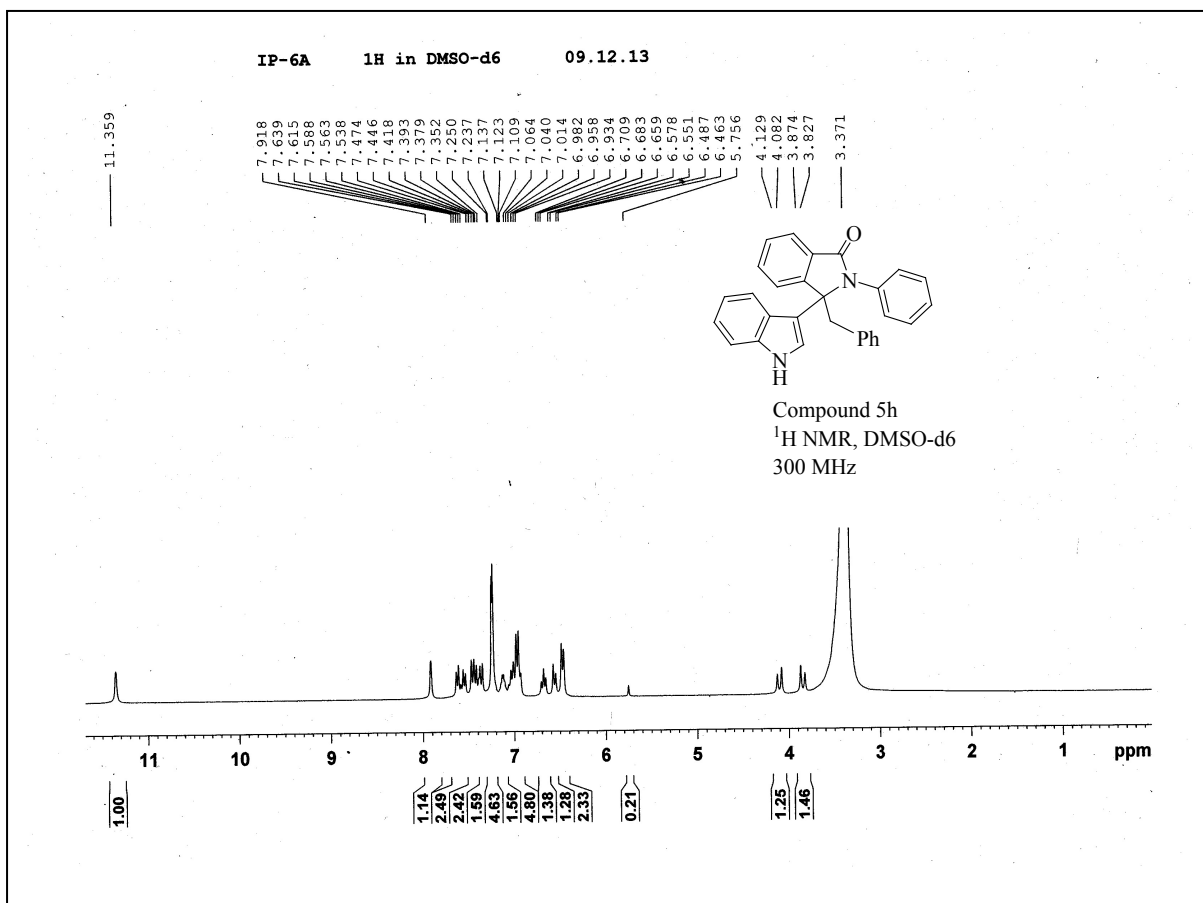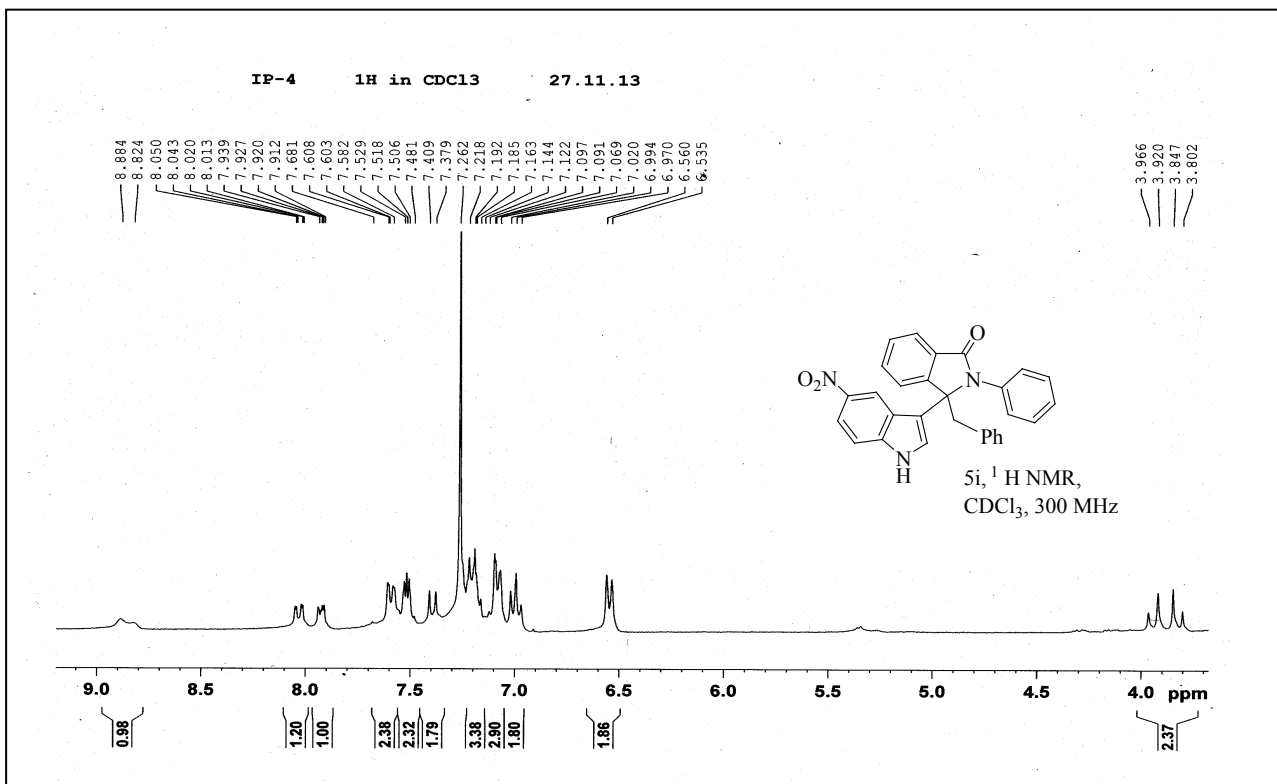

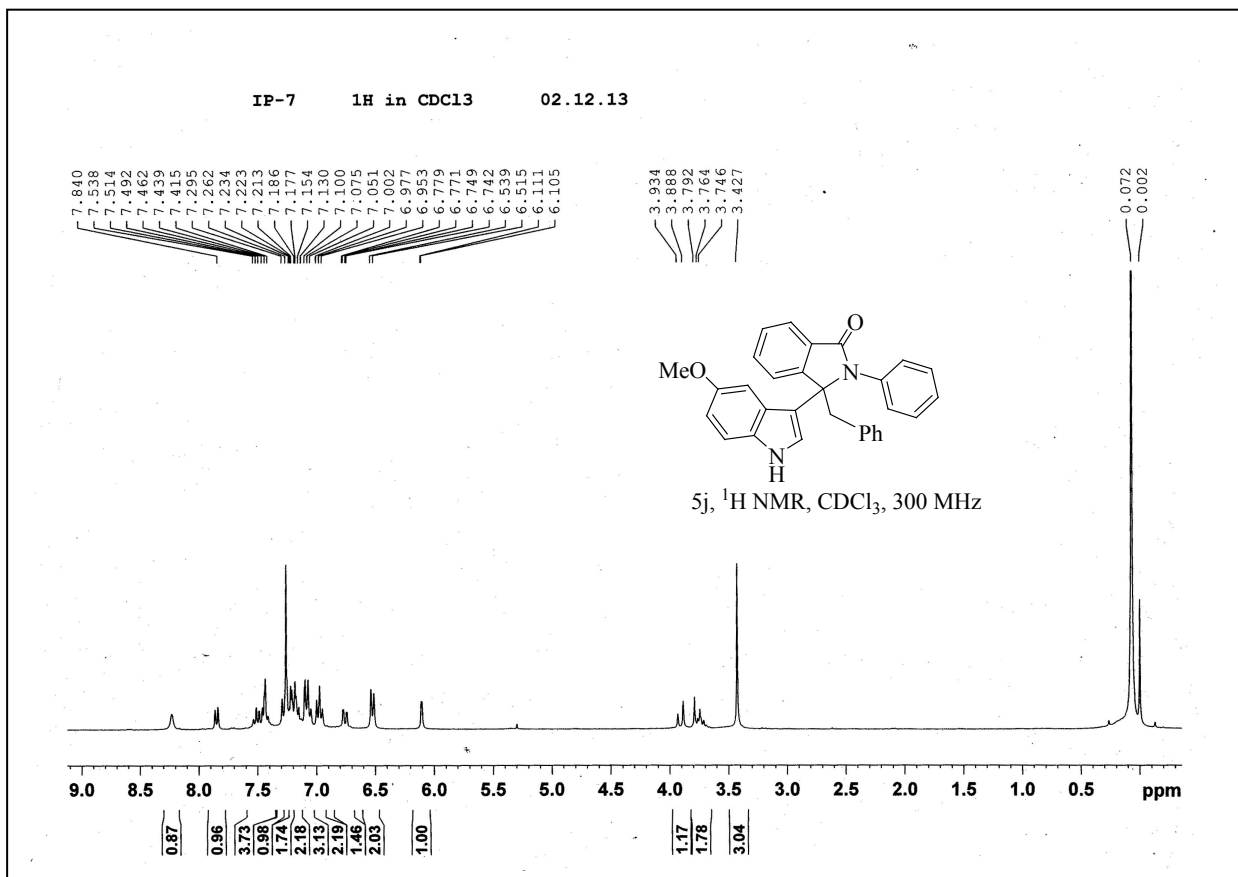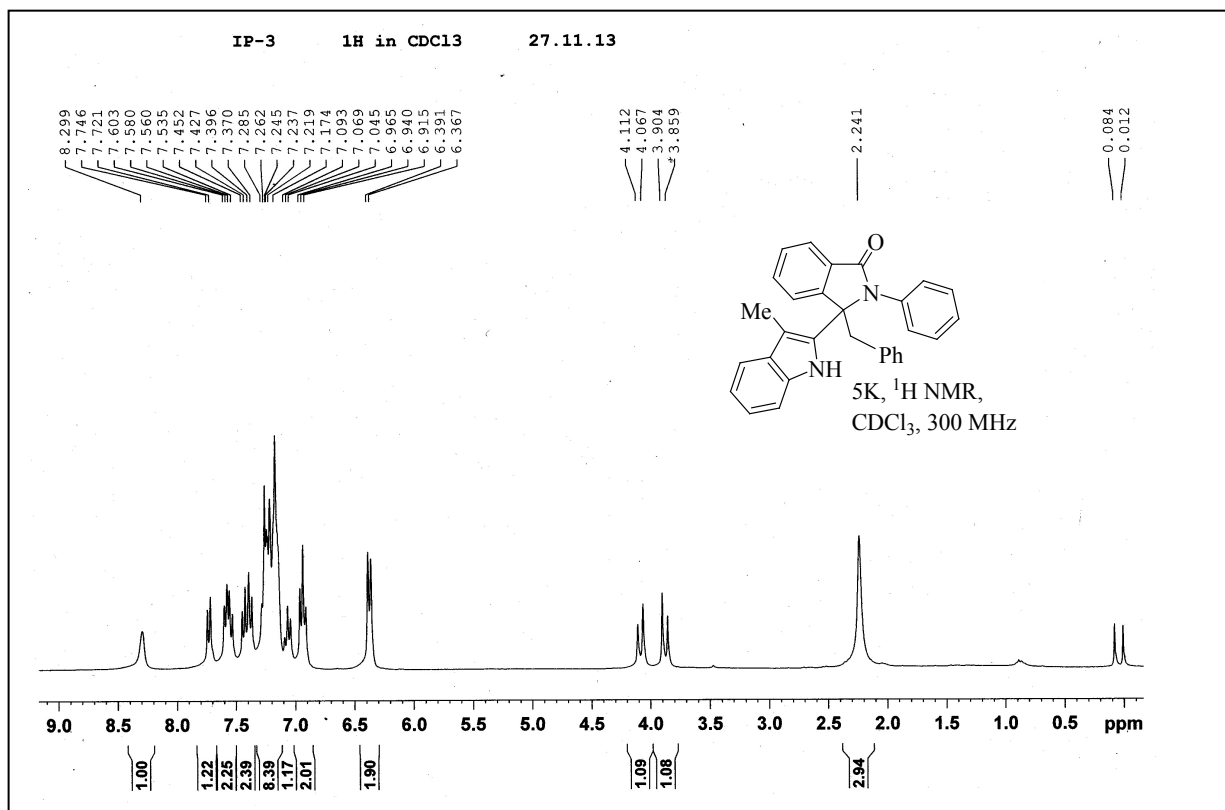

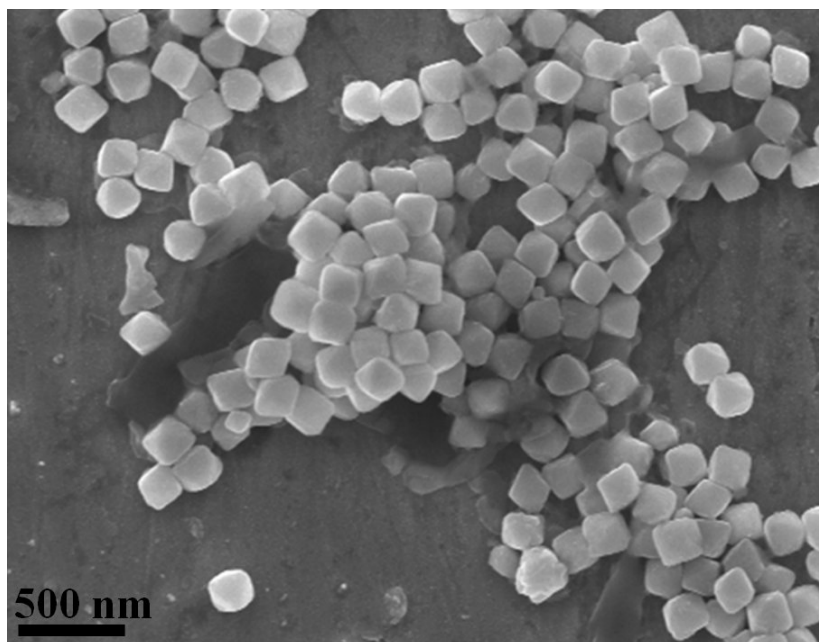

SEM image of the cuprous oxide nanoparticle in 500 nm scale bar



### Crystal Data for **5a**:

Single crystal data for compound **5a**: C<sub>25</sub>H<sub>19</sub>FN<sub>2</sub>O (Mol Wt: 342.42, triclinic, space group P-1, unit cell parameters: a) 9.384(2), b) 10.889(3), c) 11.239(3), alpha 65.601(4), beta 82.825(3), gamma 74.204(2) dcalcd) 1.262 gcm<sup>-3</sup>. Diffraction data were measured with MoK $\alpha$  (0.71073 Å) radiation at 296 K using Kappa Apex 2. The structure were solved direct methods using the SHELXL-97 program. Refinements of F<sup>2</sup> were carried out against all reflection using SHELXL – 97. The non-hydrogen atoms were refined with anisotropic thermal parameters. The hydrogen atoms were included in geometric position and given thermal parameters equivalent to 1.2 times those of the atom to which they were attached. The final R-value were R1) 0.0643, and wR2) 0.1765. These data can be obtained free of charge via <http://www.ccdc.am.ac.uk/conts/retrieving.html> (or from the Cambridge Crystallographic Data Centre, 12, Union Road, Cambridge CB2! EZ, UK; Fax: +44-1223-336033; or deposit@ccdc.cam.ac.uk) have been deposited at the Cambridge Crystallographic Data Centre. **CCDC** 967591 (Deposition No.) contains the supplementary crystallographic data for this paper). Johnson, C.K. ORTERP II, Report ORNL-5138, Oak Ridge, National Laboratory, Tennessee, USA, 1976.

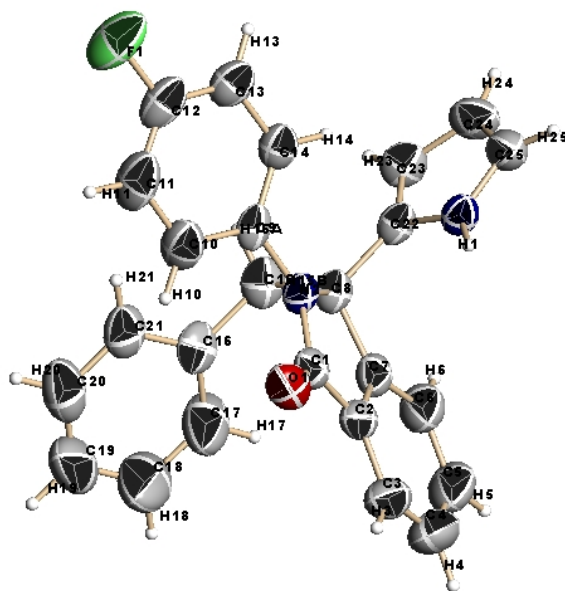

Supplement: c3ra46168h.pdf [file c3ra46168h.pdf]
